# Supplementary material
Source: publisher site journal article supplement (https://www.spandidos-publications.com/3008/downloadSupplementary)
Supplement: Supplementary file 1 [file downloadSupplementary]

## Sheet: RT-PCR-based Molecular Tests
Table SI. RT-PCR-based molecular tests currently available on the market and their main technical features.
Kit Name	Type	Target gene	Sensitivity	Specificity	LoD	Company/Supplier	Website	Time
AcculaTM SARS-CoV-2 Test	Nucleic acid amplification test (NAAT)	N	N/A	N/A	150 copies/ml	Mesa Biotech, Inc.	https://www.mesabiotech.com	30 min
Xpert Xpress SARS-CoV-2	RT-qPCR-based method	N2 - E	0.978	0.956	0.0200 PFU/ml	Cepheid	https://www.cepheid.com	30-45 min
Amplidiag® COVID-19	RT-qPCR-based method	N - orf1ab	0.989	0.988	N/A	Mobidiag	https://mobidiag.com	<3 h
QIAstat-Dx Respiratory Panel 2019-nCoV	RT-qPCR-based method	E - RdRp	N/A	N/A	400 copies/ml	Qiagen	https://www.qiagen.com	1 h
NeuMoDx SARS-CoV-2 Assay	RT-qPCR-based method	Nsp2 - N	1	1	150 copies/m	NeuModDx molecular	https://www.neumodx.com	N/A
Abbott RealTime SARS-CoV-2	RT-qPCR-based method	RdRp - N	1	1	100 copies/ml	Abbott Laboratories	https://www.molecular.abbott	~4 h
Cobas® SARS-CoV-2	RT-qPCR-based method	ORF1 a/b - E	1	1	0.009 TCID50/ml	Roche	https://diagnostics.roche.com	3 h
Vivalytic CoV Viral SARS-CoV-2 test	RT-qPCR-based method	ORF1 a/b - E	1	1	N/A	Bosch - Vivalytic	https://www.bosch-vivalytic.com	38 min
UltraGene Combo2Screen SARS-CoV-2 Assay	RT-qPCR-based method	E - N	1	1	1x10-6 TCID50/ml	ABL SA Group	https://www.ablsa.com	2 h
RealStar® SARS-CoV-2 RT-PCR Kits	RT-qPCR-based method	E - S	N/A	N/A	10 copies/PCR	Altona Diagnostics	https://altona-diagnostics.com	1 h
Bosphore Novel Coronavirus (2019-nCoV) Detection Kit	RT-qPCR-based method	ORF1 a/b - E	N/A	1	<13 copies/μl	Anatolia Diagnostics	http://www.anatoliageneworks.com	1.5 h
iAMP® COVID-19 Detection Kit	Real-time fluorescent reverse transcription isothermal assay	ORF1 a/b - N	1	1	10 copies/μl	Atila BioSystems	https://atilabiosystems.com	<1.5 h
BioGX SARS-CoV-2 Reagents (for BD MAX™ System)	RT-qPCR-based method	N1 - N2	1	1	40 GCE/ml	Becton, Dickinson	https://www.bd.com	3 h
Real-Time Fluorescent RT-PCR Kit for Detecting SARS-CoV-2	RT-qPCR-based method	ORF1 a/b	88.1	0.996	150 copies/ml	BGI Genomics	https://www.bgi.com	4 h
EurobioPlex SARS-CoV-2 Multiplex	RT-qPCR-based method	RdRp - N	>99%	0.986	N/A	Eurobio Scientific	https://www.eurobio-scientific.com	1.15 h
EURORealTime SARS-CoV-2	RT-qPCR-based method	ORF1 a/b - N	1	0.982	1 copy/μl	EUROIMMUN; PerkinElmer, Inc.	https://www.euroimmun.com	~1.5 h
Panther Fusion® SARS-CoV-2 Assay	RT-qPCR-based method	ORF1 a/b	1	1	1x10-2 TCID50/ml	Hologic, Inc.	https://www.hologic.com	2-4 h
TaqPath COVID-19 CE-IVD RT-PCR Kit	RT-qPCR-based method	ORF1 a/b - N - S	1	1	10 GCE/reaction	Applied Biosystems; Thermo Fisher Scientific, Inc.	https://www.thermofisher.com/it/en/home.html	<2 h
OPTI® SARS-CoV-2 RT PCR Test	RT-qPCR-based method	N1 - N2	1	1	1 copy/μl	OPTI Medical Systems, Inc.	https://www.optimedical.com	2-3 h
COVID-19 genesig® Real-Time PCR assay	RT-qPCR-based method	RdRp	0.947	1	0.33 copies/μl	Primerdesign Ltd.	https://www.genesig.com	2-4 h
Lyra® SARS-CoV-2 Assay	RT-qPCR-based method	Pp1ab	1	1	0.8 copies/μl	Quidel Corporation Headquarters	https://www.quidel.com	75 min
Novel Coronavirus (2019-nCoV) Nucleic Acid Diagnostic Kit (PCR-Fluorescence Probing)	RT-qPCR-based method	ORF1 a/b - N	94.3%	0.99	200 copies/ml	Sansure Biotech, Inc.	http://eng.sansure.com.cn	~1.5 h
STANDARD M nCoV Real-Time Detection kit	RT-qPCR-based method	ORF1ab - E	1	1	0.5 copies/μl	SD Biosensor Inc	http://sdbiosensor.com/	~1.5 h
AllplexTM2019-nCoV Assay	RT-qPCR-based method	RdRp - N - E	1	0.9307	4.167 copies/ml	Seegene, Inc	http://www.seegene.com/	<2 h
2019-Novel Coronavirus (2019-nCoV) RT-PCR Detection Kit	RT-qPCR-based method	ORF1ab - N - E	0.9953	0.9792	300 copies/ml	Shanghai Fosun Long March Medical Science Co., Ltd.	http://en.lm-diagnostics.com.cn	~2 h
YouSeq Multiplex Covid19 qPCR Kit	RT-qPCR-based method	RdRp - N - E	1	1	0.7 copies/μl	YouSeq Ltd.	https://youseq.com	2-4 h
VitaPCR SARS-CoV-2 assay	RT-qPCR-based method	N	1	1	2.73 copies/μl	Credo Diagnostics Biomedical Pte Ltd.	www.credodxbiomed.com	~20 min
LYRA SARS-CoV-2 assay	RT-qPCR-based method	pp1ab	1	1	8.00E-01 copies/μl	Diagnostic Hybrids, Inc. Quidel Corporation	https://www.quidel.com	<2 h
Simplexa COVID-19 Direct	RT-qPCR-based method	ORF1ab - S	1	1	500 copies/ml	DiaSorin Molecular LLC	https://molecular.diasorin.com	~1.5 h
ARIES® SARS-CoV-2 Assay	RT-qPCR-based method	ORF1ab - N	1	1	5.48 E-02 TCID50/ml	Luminex Corporation	https://www.luminexcorp.com	~2 h
MiRXES FORTITUDE KIT 2.1	RT-qPCR-based method	ORF1ab	1	1	10 copies/reaction	MiRXES Pte Ltd.	https://mirxes.com	<2 h
E, envelope gene; Nsp2, non-structural protein 2 gene; N, nucleocapside gene; ORF1ab, open reading frame 1ab gene; pp1ab, polyprotein 1ab gene; Rdrp, RNA-dependent RNA polymerase gene; S, Spike gene; GCE, genome copy equivalent; LoD, limit of detection; N/A, not available; TCID50, median tissue culture infectious dose.
